# Supplementary material for: Hymenolepis diminuta Reduce Lactic Acid Bacterial Load and Induce Dysbiosis in the Early Infection of the Probiotic Colonization of Swiss Albino Rat
Source: MDPI journal article supplement (doi:10.3390/microorganisms10122328), 2022-11-24
Supplement: s1 [file s1]

**Table S1.** Database showing matching for the strain S10

| Sl. No. | Organism Name                                                                 | Accession No. | % Match |
|---------|-------------------------------------------------------------------------------|---------------|---------|
| 1       | Lactobacillus brevis ATCC 14869 = DSM 20054 16S ribosomalRNA                  | NR_116238.1   | 99.37%  |
| 2       | Lactobacillus brevis strain ATCC 14869 16S ribosomal RNA                      | NR_044704.2   | 98.90%  |
| 3       | Lactobacillus senmaizukei DSM 21775 = NBRC 103853 16Sribosomal RNA            | NR_114251.1   | 97.67%  |
| 4       | Lactobacillus hammesii strain type strain: TMW 1.1236 16Sribosomal RNA        | NR_042243.1   | 97.67%  |
| 5       | Lactobacillus yonginensis strain THK-V8 16S ribosomal RNA                     | NR_109452.1   | 97.55%  |
| 6       | Lactobacillus cerevisiae strain TUM BP 140423000-2250 16Sribosomal RNA        | NR_158030.1   | 97.46%  |
| 7       | Lactobacillus senmaizukei DSM 21775 = NBRC 103853 strainL13 16S ribosomal RNA | NR_041584.1   | 97.42%  |
| 8       | Lactobacillus koreensis JCM 16448 strain DCY50 16S ribosomalRNA               | NR_116854.1   | 97.38%  |
| 9       | Lactobacillus parabrevis strain LMG 11984 16S ribosomal RNA                   | NR_042456.1   | 97.26%  |
| 10      | Lactobacillus spicheri strain LTH 5753 16S ribosomal RNA                      | NR_025579.1   | 97.13%  |

**Table S2.** Database showing matching for the strain S13

| Description                                                                        | Max Score | Total Score | Query Cover | E value | Per. Ident | Acc. Len | Accession   |
|------------------------------------------------------------------------------------|-----------|-------------|-------------|---------|------------|----------|-------------|
| Lactobacillus johnsonii strain CIP 103620 16S ribosomal RNA, partial sequence      | 987       | 987         | 57 %        | 0.0     | 88.46%     | 1543     | NR_117574.1 |
| Lactobacillus taiwanensis strain BCRC 17755 16S ribosomal RNA, partial sequence    | 987       | 987         | 57 %        | 0.0     | 88.46%     | 1526     | NR_044507.1 |
| Lactobacillus gasseri ATCC 33323 = JCM 1131 16S ribosomal RNA, complete sequence   | 981       | 981         | 57 %        | 0.0     | 88.34%     | 1573     | NR_075051.2 |
| Lactobacillus gasseri strain CIP 102991 16S ribosomal RNA, partial sequence        | 981       | 981         | 57 %        | 0.0     | 88.34%     | 1529     | NR_117573.1 |
| Lactobacillus hominis DSM 23910 = CRBIP 24.179 16S ribosomal RNA, partial sequence | 981       | 981         | 57 %        | 0.0     | 88.34%     | 1565     | NR_125548.1 |
| Lactobacillus gasseri ATCC 33323 = JCM 1131 16S ribosomal RNA, complete sequence   | 981       | 981         | 57 %        | 0.0     | 88.34%     | 1572     | NR_041920.1 |
| Lactobacillus johnsonii strain ATCC 33200 16S ribosomal RNA, partial sequence      | 976       | 976         | 57 %        | 0.0     | 88.22%     | 1487     | NR_025273.1 |
| Lactobacillus colini strain 111144-L1 16S ribosomal RNA, partial sequence          | 953       | 953         | 61 %        | 0.0     | 86.63%     | 1566     | NR_156075.1 |
| Lactobacillus rodentium strain MYMRS/TLU1 16S ribosomal RNA, partial sequence      | 887       | 887         | 57 %        | 0.0     | 86.34%     | 1436     | NR_133768.1 |
| Lactobacillus jensenii strain ATCC 25258 16S ribosomal RNA, partial sequence       | 865       | 865         | 57 %        | 0.0     | 85.87%     | 1496     | NR_025087.1 |

**Table S3.** Database showing matching for the strain S14

| Sl.<br>No. | Organism Name                                               | Accession<br>No. | % Match |
|------------|-------------------------------------------------------------|------------------|---------|
| 1          | Lactobacillus johnsonii strain 1696 16S ribosomal RNA gene. | MT597568.1       | 99.85%  |
| 2          | Lactobacillus johnsonii strain 1000 16S ribosomal RNA gene. | MT585638.1       | 99.85%  |
| 3          | Lactobacillus johnsonii strain 681 16S ribosomal RNA gene.  | MT585442.1       | 99.85%  |
| 4          | Lactobacillus johnsonii strain 680 16S ribosomal RNA gene.  | MT585441.1       | 99.85%  |
| 5          | Lactobacillus johnsonii strain 667 16S ribosomal RNA gene.  | MT585433.1       | 99.85%  |
| 6          | Lactobacillus johnsonii strain 666 16S ribosomal RNA gene.  | MT585432.1       | 99.85%  |
| 7          | Lactobacillus johnsonii strain 658 16S ribosomal RNA gene.  | MT585425.1       | 99.85%  |
| 8          | Lactobacillus johnsonii strain 1447 16S ribosomal RNA gene. | MT573842.1       | 99.85%  |
| 9          | Lactobacillus johnsonii strain 1029 16S ribosomal RNA gene. | MT573563.1       | 99.85%  |
| 10         | Lactobacillus johnsonii strain 7991 16S ribosomal RNA gene. | MT538892.1       | 99.85%  |

**Table S4.** Database showing matching for the strain S17

| Description                                                                   | Max Score | Total Score | Query Cover | E value | Per. Ident | Acc. Len | Accession   |
|-------------------------------------------------------------------------------|-----------|-------------|-------------|---------|------------|----------|-------------|
| Lactobacillus reuteri DSM 20016 16S ribosomal RNA, partial sequence           | 2636      | 2636        | 99 %        | 0.0     | 99.72%     | 1569     | NR_075036.1 |
| Lactobacillus reuteri DSM 20016 16S ribosomal RNA, partial sequence           | 2623      | 2623        | 99 %        | 0.0     | 99.51%     | 1571     | NR_119069.1 |
| Lactobacillus reuteri strain NBRC 15892 16S ribosomal RNA, partial sequence   | 2604      | 2604        | 98 %        | 0.0     | 99.72%     | 1501     | NR_113820.1 |
| Lactobacillus caviae strain MOZM2 16S ribosomal RNA, partial sequence         | 2518      | 2518        | 99 %        | 0.0     | 98.39%     | 1487     | NR_157747.1 |
| Lactobacillus frumenti strain TMW 1.666 16S ribosomal RNA, partial sequence   | 2423      | 2423        | 99 %        | 0.0     | 97.08%     | 1561     | NR_025371.1 |
| Lactobacillus pontis strain LTH 2587 16S ribosomal RNA, partial sequence      | 2418      | 2418        | 99 %        | 0.0     | 97.02%     | 1568     | NR_036788.2 |
| Lactobacillus reuteri strain F275 16S ribosomal RNA, partial sequence         | 2405      | 2405        | 99 %        | 0.0     | 96.96%     | 1535     | NR_025911.1 |
| Lactobacillus vaginalis strain ATCC 49540 16S ribosomal RNA, partial sequence | 2399      | 2399        | 99 %        | 0.0     | 96.99%     | 1541     | NR_041796.1 |
| Lactobacillus oris strain DSM 4864 16S ribosomal RNA, partial sequence        | 2346      | 2346        | 99 %        | 0.0     | 96.17%     | 1512     | NR_026309.1 |
| Lactobacillus panis strain DSM 6035 16S ribosomal RNA, partial sequence       | 2327      | 2327        | 99 %        | 0.0     | 96.14%     | 1490     | NR_026310.1 |

**Table S5.** Database showing matching for the strain S27

| Sl. No. | Organism Name                                                                       | Accession No. | % Match |
|---------|-------------------------------------------------------------------------------------|---------------|---------|
| 1       | Lactiplantibacillus plantarum strain CIP 103151 16Sribosomal RNA                    | NR_104573.1   | 96.81%  |
| 2       | Lactiplantibacillus plantarum strain JCM 1149 16Sribosomal RNA                      | NR_117813.1   | 96.81%  |
| 3       | Lactiplantibacillus plantarum strain NRRL B-1476816S ribosomal RNA                  | NR_042394.1   | 96.81%  |
| 4       | Lactobacillus pentosus strain 124-2 16Sribosomal RNA                                | NR_029133.1   | 96.81%  |
| 5       | Lactiplantibacillus plantarum strain NBRC 15891 16S ribosomal RNA                   | NR_113338.1   | 96.74%  |
| 6       | Lactiplantibacillus plantarum strain NBRC 15891 16S ribosomal RNA                   | NR_112690.1   | 96.74%  |
| 7       | Lactobacillus paraplantarum strain DSM 10667 16S ribosomal RNA                      | NR_025447.1   | 96.74%  |
| 8       | Lactiplantibacillus plantarum strain JCM 1149 16S ribosomal RNA                     | NR_115605.1   | 96.74%  |
| 9       | Lactiplantibacillus plantarum subsp. argentoratensisstrain DKO 22 16S ribosomal RNA | NR_042254.1   | 96.16%  |
| 10      | Lactobacillus fabifermentans strain DSM 21115 16S ribosomal RNA                     | NR_113339.1   | 96.16%  |

**Table S6.** Database showing matching for the strain S29

| Description                                                                        | Max Score | Total Score | Query Cover | E value | Per. Ident | Acc. Len | Accession   |
|------------------------------------------------------------------------------------|-----------|-------------|-------------|---------|------------|----------|-------------|
| Lactobacillus johnsonii strain CIP 103620 16S ribosomal RNA, partial sequence      | 2782      | 2782        | 99%         | 0.0     | 99.87%     | 1543     | NR_117574.1 |
| Lactobacillus taiwanensis strain BCRC 17755 16S ribosomal RNA, partial sequence    | 2776      | 2776        | 99%         | 0.0     | 99.80%     | 1526     | NR_044507.1 |
| Lactobacillus gasseri ATCC 33323 = JCM 1131 16S ribosomal RNA, partial sequence    | 2754      | 2754        | 99%         | 0.0     | 99.54%     | 1572     | NR_041920.1 |
| Lactobacillus gasseri ATCC 33323 = JCM 1131 16S ribosomal RNA, complete sequence   | 2754      | 2754        | 99%         | 0.0     | 99.54%     | 1573     | NR_075051.2 |
| Lactobacillus gasseri strain CIP 102991 16S ribosomal RNA, partial sequence        | 2723      | 2723        | 98%         | 0.0     | 99.53%     | 1529     | NR_117573.1 |
| Lactobacillus johnsonii strain ATCC 33200 16S ribosomal RNA, partial sequence      | 2719      | 2719        | 97%         | 0.0     | 99.66%     | 1487     | NR_025273.1 |
| Lactobacillus hominis DSM = 23910 CRBIP 24.179 16S ribosomal RNA, partial sequence | 2686      | 2686        | 99%         | 0.0     | 98.75%     | 1565     | NR_125548.1 |
| Lactobacillus colini strain 111144-L1 16S ribosomal RNA, partial sequence          | 2527      | 2527        | 99%         | 0.0     | 96.83%     | 1566     | NR_156075.1 |
| Lactobacillus rodentium strain MYMRS/TLU1 16S ribosomal RNA, partial sequence      | 2423      | 2423        | 94%         | 0.0     | 97.08%     | 1436     | NR_133768.1 |
| Lactobacillus iners strain DSM 13335 16S ribosomal RNA gene, partial sequence      | 2364      | 2364        | 99%         | 0.0     | 94.91%     | 1539     | NR_036982.1 |

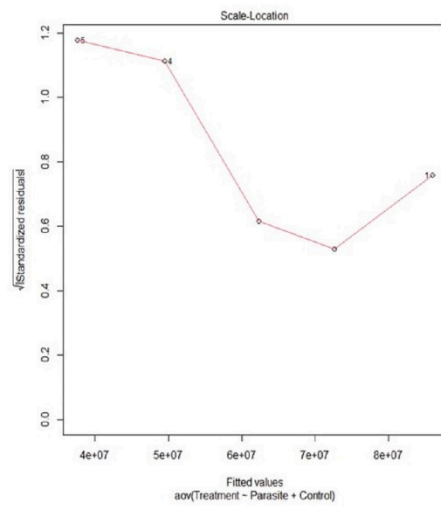

(a)

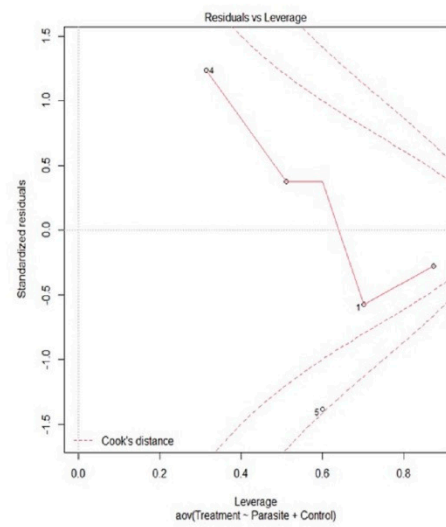

(b)

**Figure S1.** Detection of outlier in the LAB load: (a) shows the fifth datapoint, i.e., the mean LAB load with respect to parasitic load of 18, is a potential outlier; (b) Cook's distance is less than 1 for this data point, so the data point can be retained in the dataset.
